# Supplementary material for: Adenoviral vector delivery of RNA-guided CRISPR/Cas9 nuclease complexes induces targeted mutagenesis in a diverse array of human cells
Source: PubMed Central journal article supplement — Sci Rep. 2014 May 29;4:5105. doi: 10.1038/srep05105 (PMC4037712; doi:10.1038/srep05105), 2014-05-29
Supplement: srep05105-s1.pdf [file srep05105-s1.pdf]

Adenoviral vector delivery of RNA-guided CRISPR/Cas9 nuclease complexes induces targeted mutagenesis in a diverse array of human cells.  
Ignazio Maggio, Maarten Holkers, Jin Liu, Josephine M. Janssen, Xiaoyu Chen & Manuel A.F.V. Gonçalves.

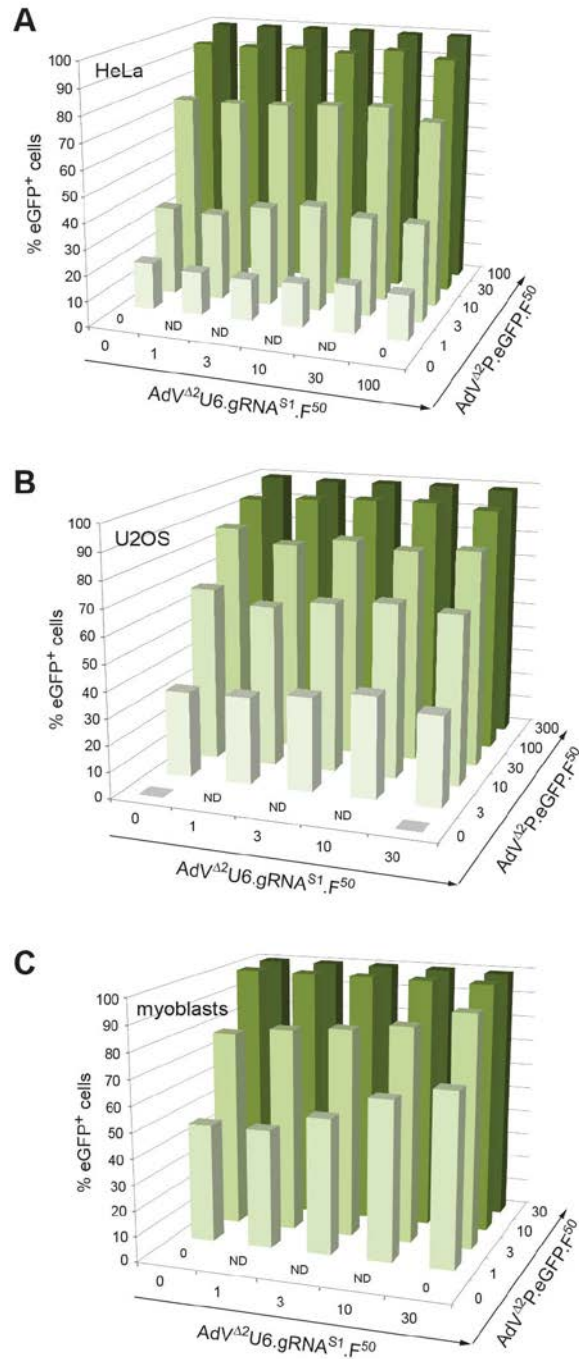

Adenoviral vector delivery of RNA-guided CRISPR/Cas9 nuclease complexes induces targeted mutagenesis in a diverse array of human cells.  
Ignazio Maggio, Maarten Holkers, Jin Liu, Josephine M. Janssen, Xiaoyu Chen & Manuel A.F.V. Gonçalves.

**Supplementary Fig. 1. Gene delivery activities in target cells co-transduced with AdV<sup>Δ2</sup>U6.gRNAS1.F<sup>50</sup> and reporter vector AdV<sup>Δ2</sup>P.eGFP.F<sup>50</sup>.** Flow cytometry-based quantification of transduction levels in cervix carcinoma HeLa cells (A), osteosarcoma U2OS cells (B) and human myoblasts (C) exposed to different combined dosages (in TU/cell) of AdV<sup>Δ2</sup>P.eGFP.F<sup>50</sup> and AdV<sup>Δ2</sup>U6.gRNA<sup>S1</sup>.F<sup>50</sup>. The transgene regulatory elements in the reporter vector AdV<sup>Δ2</sup>P.eGFP.F<sup>50</sup> are the same as those in the Cas9-encoding vector AdV<sup>Δ2</sup>P.Cas9.F<sup>50</sup>. The experimental conditions were the same as those applied in transduction experiments with AdV<sup>Δ2</sup>P.Cas9.F<sup>50</sup> and AdV<sup>Δ2</sup>U6.gRNA<sup>S1</sup>.F<sup>50</sup> (Figs. 4, 5 and 6, respectively). ND, not done.

Adenoviral vector delivery of RNA-guided CRISPR/Cas9 nuclease complexes induces targeted mutagenesis in a diverse array of human cells.  
Ignazio Maggio, Maarten Holkers, Jin Liu, Josephine M. Janssen, Xiaoyu Chen & Manuel A.F.V. Gonçalves.

| Temperature    | Time        |
|----------------|-------------|
| 95 °C          | 10 min      |
| 95 °C to 85 °C | -2.0 °C/sec |
| 85 °C          | 1 min       |
| 85 °C to 75 °C | -0.3 °C/sec |
| 75 °C          | 1 min       |
| 75 °C to 65 °C | -0.3 °C/sec |
| 65 °C          | 1 min       |
| 65 °C to 55 °C | -0.3 °C/sec |
| 55 °C          | 1 min       |
| 55 °C to 45 °C | -0.3 °C/sec |
| 45 °C          | 1 min       |
| 45 °C to 35 °C | -0.3 °C/sec |
| 35 °C          | 1 min       |
| 35 °C to 25 °C | -0.3 °C/sec |
| 25 °C          | 1 min       |
| 16 °C          | Hold        |

**Supplementary Table S1.** Thermocycler denaturation and re-annealing program for the generation of heteroduplex amplicons corresponding to sequences spanning nuclease target sites (source: SURVEYOR<sup>®</sup> Mutation Detection Kit [Transgenomic]).
